# Supplementary material for: Infrared multiple-photon dissociation spectroscopy of cationized glycine: effects of alkali metal cation size on gas-phase conformation
Source: Royal Society of Chemistry journal article supplement (doi:10.1039/d2cp03469g), 2022-01-01
Supplement: d2cp03469g1.pdf [file d2cp03469g1.pdf]

Supporting Information for

## Infrared Multiple Photon Dissociation Spectroscopy of Cationized Glycine: Effects of Alkali Metal Cation Size on Gas-Phase Conformation

P. B. Armentrout, Brandon C. Stevenson, Maryam Ghiassaei, Georgia C. Boles, Giel Berden, and Jos Oomens

### Figure Captions

Figure S1: Infrared multiple photon dissociation action spectra of  $M^+(\text{Gly})$  complexes where  $M^+ = K^+, Rb^+, \text{ and } Cs^+$  taken on the FTICR (black trace) and QIT (red trace).

Figure S2. Relative Gibbs energies (kJ/mol) at 298 K calculated at the Level/6-311+G(2d,2p) or Level/def2TZVPP level of theory for six distinct structures of  $M^+(\text{Gly})$ , where  $M^+ = Li^+, Na^+, K^+, Rb^+, \text{ and } Cs^+$  as a function of the alkali-metal cation relative to the energy of the most stable structure. Level includes B3LYP, B3LYP-GD3BJ, B3P86, and MP2(full).

Figure S3: Relaxed potential energy surface scans of the MOC bond angle in  $M^+(\text{Gly})$  calculated at the B3LYP, B3LYP-GD3BJ, and MP2(full) levels of theory for  $M = Li, Na, K$  (6-311+G(d,p) basis set) and  $M = Rb, Cs$  (def2TZVP basis set). Horizontal lines indicate the relative energies including zero-point energies of the stationary states.

Figure S4: Comparison of the experimental IRMPD action spectrum for  $Rb^+(\text{Gly})$  and  $Cs^+(\text{Gly})$  (dashed line) with harmonic IR spectra for five structures predicted at the B3LYP/def2TZVP level except for [CO,OH]cc, which were calculated at the MP2/def2TZVP level. Relative Gibbs energies (kJ/mol) at 298 K are provided at the B3LYP, B3LYP-GD3BJ, B3P86, and MP2 levels.

Table S1: 0 K Relative Gibbs Energies (kJ/mol) of Low-Lying Conformers of M<sup>+</sup>(Gly) Calculated at B3LYP, B3LYP-GD3BJ, B3P86, and MP2(full) Levels of Theory<sup>a</sup>

| Structure                         | Li <sup>+</sup> (Gly)                                                      | Na <sup>+</sup> (Gly)     | K <sup>+</sup> (Gly)                    | Rb <sup>+</sup> (Gly)                                                                          | Cs <sup>+</sup> (Gly)                                                                          |
|-----------------------------------|----------------------------------------------------------------------------|---------------------------|-----------------------------------------|------------------------------------------------------------------------------------------------|------------------------------------------------------------------------------------------------|
| [N,CO]tt                          | <b>0.0, 0.0, 0.0, 0.0</b>                                                  | <b>0.0, 0.0, 0.0, 0.0</b> | 3.9, 0.2, 6.4, 2.8 (1.4)                | 7.8, 4.1, 10.7, 6.4                                                                            | 11.3, 7.5, 13.4, 7.9                                                                           |
| [CO <sub>2</sub> <sup>-</sup> ]cc | 21.5, 0, 23.7, 18.6, 17.0                                                  | 10.5, 13.5, 7.4, 7.6      | 12.1, 11.1, 10.9, 9.9                   | 19.4, 18.3, 17.6, 14.5                                                                         | 22.0, 20.5, 19.3, 14.4                                                                         |
| [N,CO]ct                          | 22.3, 21.8, 22.2, 22.7                                                     | 21.5, 21.2, 21.3, 21.8    | 23.8, 19.9, 26.4, 23.2                  | 26.9, 23.0, 29.6, 26.5                                                                         | 28.9, 25.1, 31.0, 26.2                                                                         |
| [CO]cc                            | 29.2, 31.5, 25.6, 32.2                                                     | 10.4, 13.7, 6.2, 11.8     | <b>0.0, 0.1, 0.0, 2.6 (2.1)</b>         | <b>0.0, 0.0, 0.0, 2.1 (0.8)</b>                                                                | <b>0.0, 0.0, 0.0, 0.7 (0.0)</b>                                                                |
| [CO,OH]cc                         | 41.3, <sup>b</sup> 41.9, <sup>b</sup> 35.8, <sup>b</sup> 38.4 <sup>b</sup> | 10.7, 13.7, 6.5, 9.1      | 0.6, <b>0.0</b> , 0.3, <b>0.0 (0.0)</b> | 4.2, <sup>b</sup> 0.1, <sup>b</sup> 2.4, <sup>b</sup> <b>0.0<sup>b</sup></b><br>( <b>0.0</b> ) | 4.7, <sup>b</sup> 0.4, <sup>b</sup> 2.7, <sup>b</sup> <b>0.0<sup>b</sup></b><br>( <b>0.6</b> ) |
| [N,OH]tc                          | 45.5, 43.2, 47.7, 39.1                                                     | 41.3, 39.4, 42.9, 35.7    | 41.9, 36.0, 45.8, 35.7                  | 45.0, 39.1, 49.1, 39.3                                                                         | 47.6, 41.5, 51.0, 40.8                                                                         |
| [CO]tc                            | 70.6, 73.5, 71.0, 75.7                                                     | 49.0, 53.1, 48.5, 51.6    | 35.3, 36.0, 39.0, 38.8                  | 36.7, 40.2, <sup>c</sup> 41.2, 40.1                                                            | 33.2, 33.7, 37.3, 36.2                                                                         |
| [CO]ct                            | 72.5, 75.1, 72.5, 77.3                                                     | 50.0, 53.7, 49.4, 52.6    | 37.4, 37.7, 40.9, 40.7                  | 36.3, 36.5, 39.7, 41.2                                                                         | 34.8, 35.0, 38.5, 37.5                                                                         |
| [N]tt                             | 87.0, 86.9, 84.4, 81.8                                                     | 61.5, 62.5, 60.0, 57.6    | 50.6, 48.0, 52.8, 47.5                  | 49.1, 46.7, 51.7, 47.1                                                                         | 47.9, 45.1, 50.3, 47.0                                                                         |

<sup>a</sup> B3LYP, B3LYP-GD3BJ, B3P86, and MP2 (full) (CCSD(T,full)) values calculated using the 6-311+G(2d,2p) or def2-TZVPP basis set with the structures and zero-point energies calculated at the B3LYP/6-311+G(d,p) or B3LYP/def2-TZVP level of theory. Bold indicates the ground state. <sup>b</sup> Collapses to [CO]cc. Values are single point calculations using MP2(full)/6-311+G(d,p) or MP2(full)/def2-TZVP structures and zero-point energies. <sup>c</sup> Collapses to [N,CO]tt. Value is single point calculation using B3LYP/def2-TZVP structure and zero-point energy.

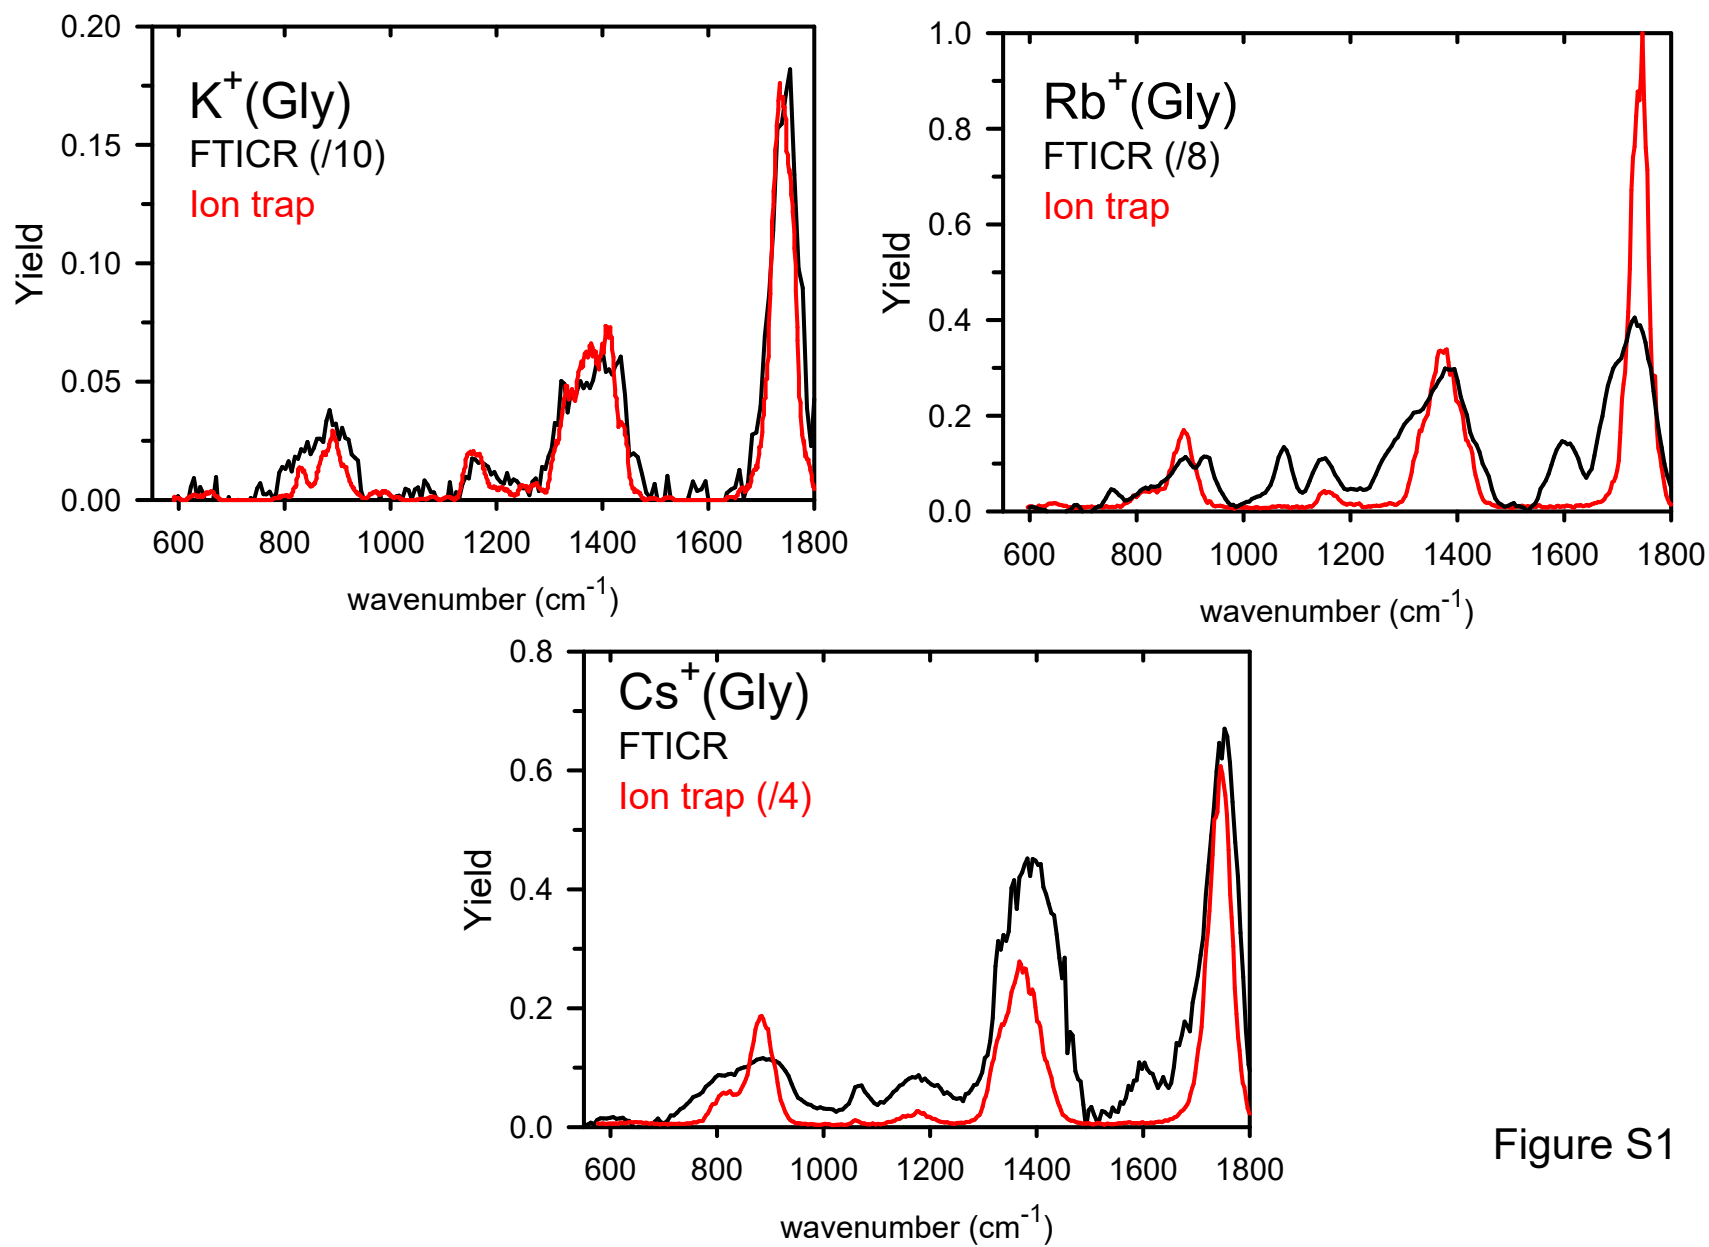

Figure S1

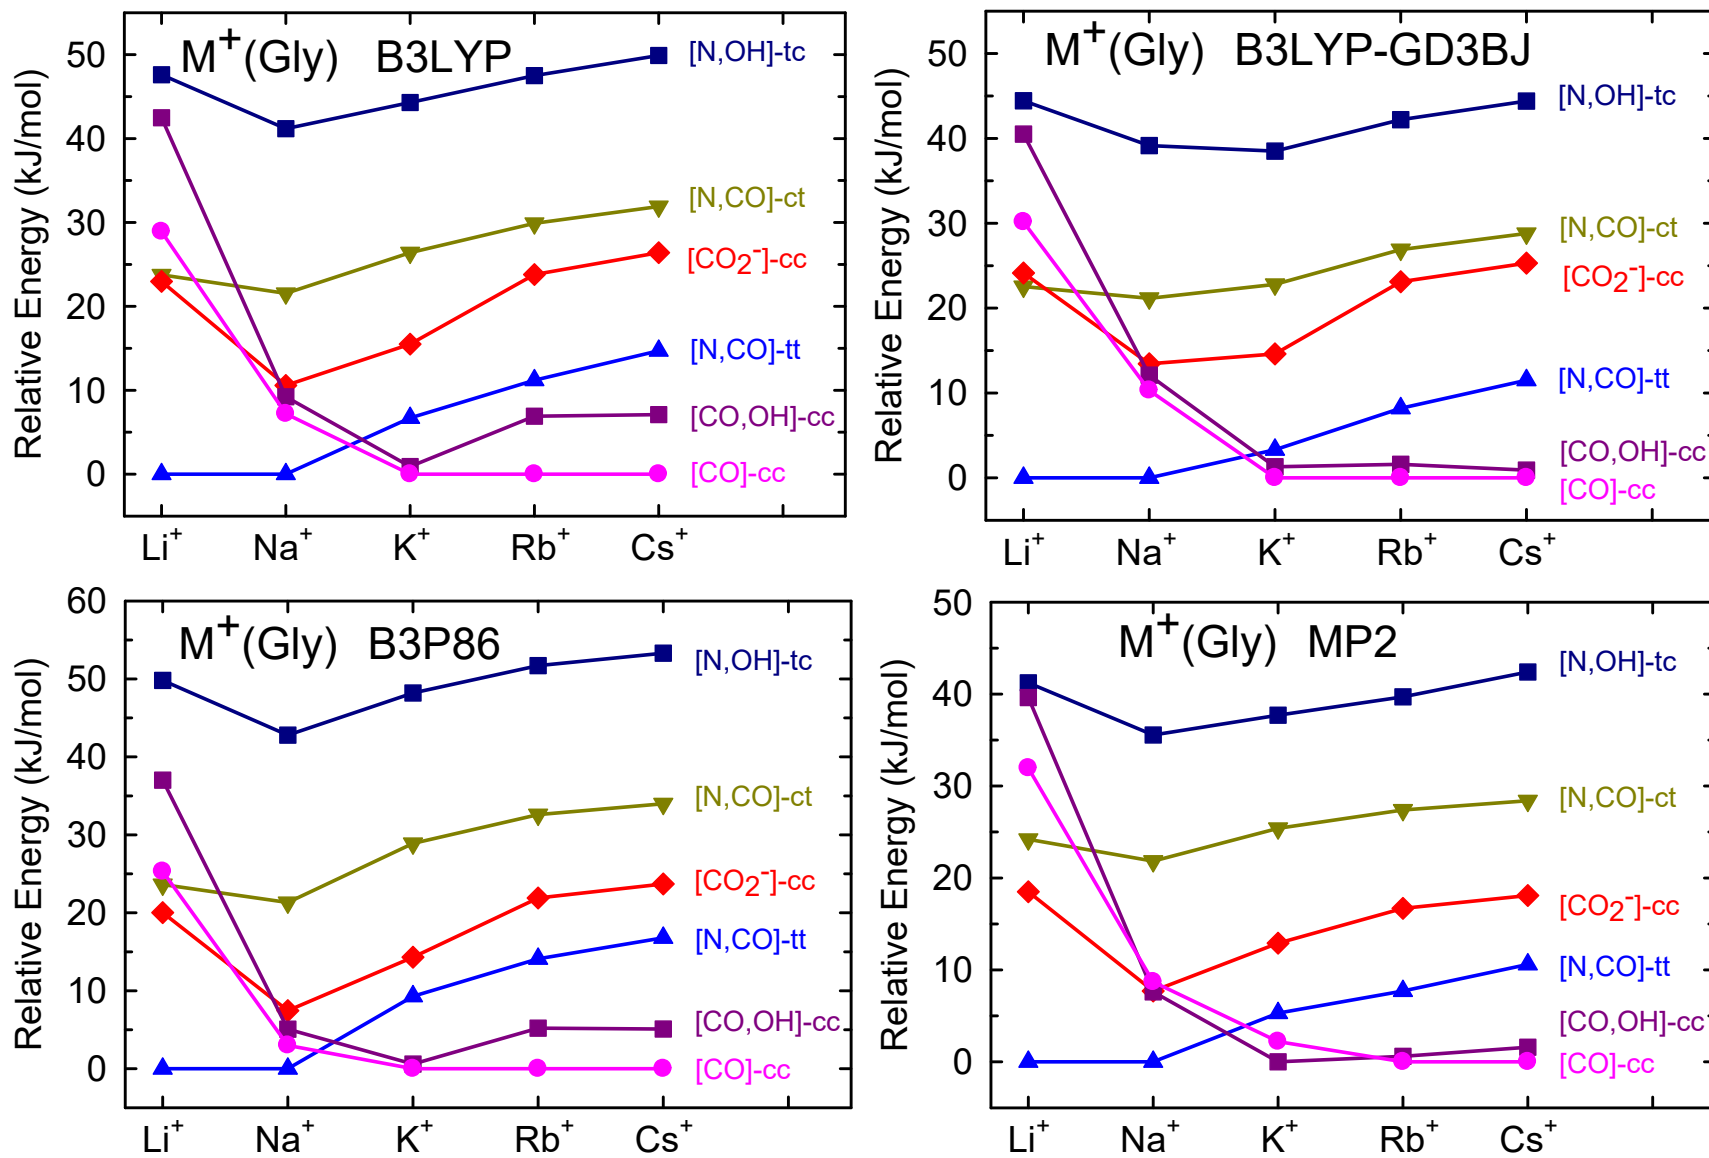

Figure S2

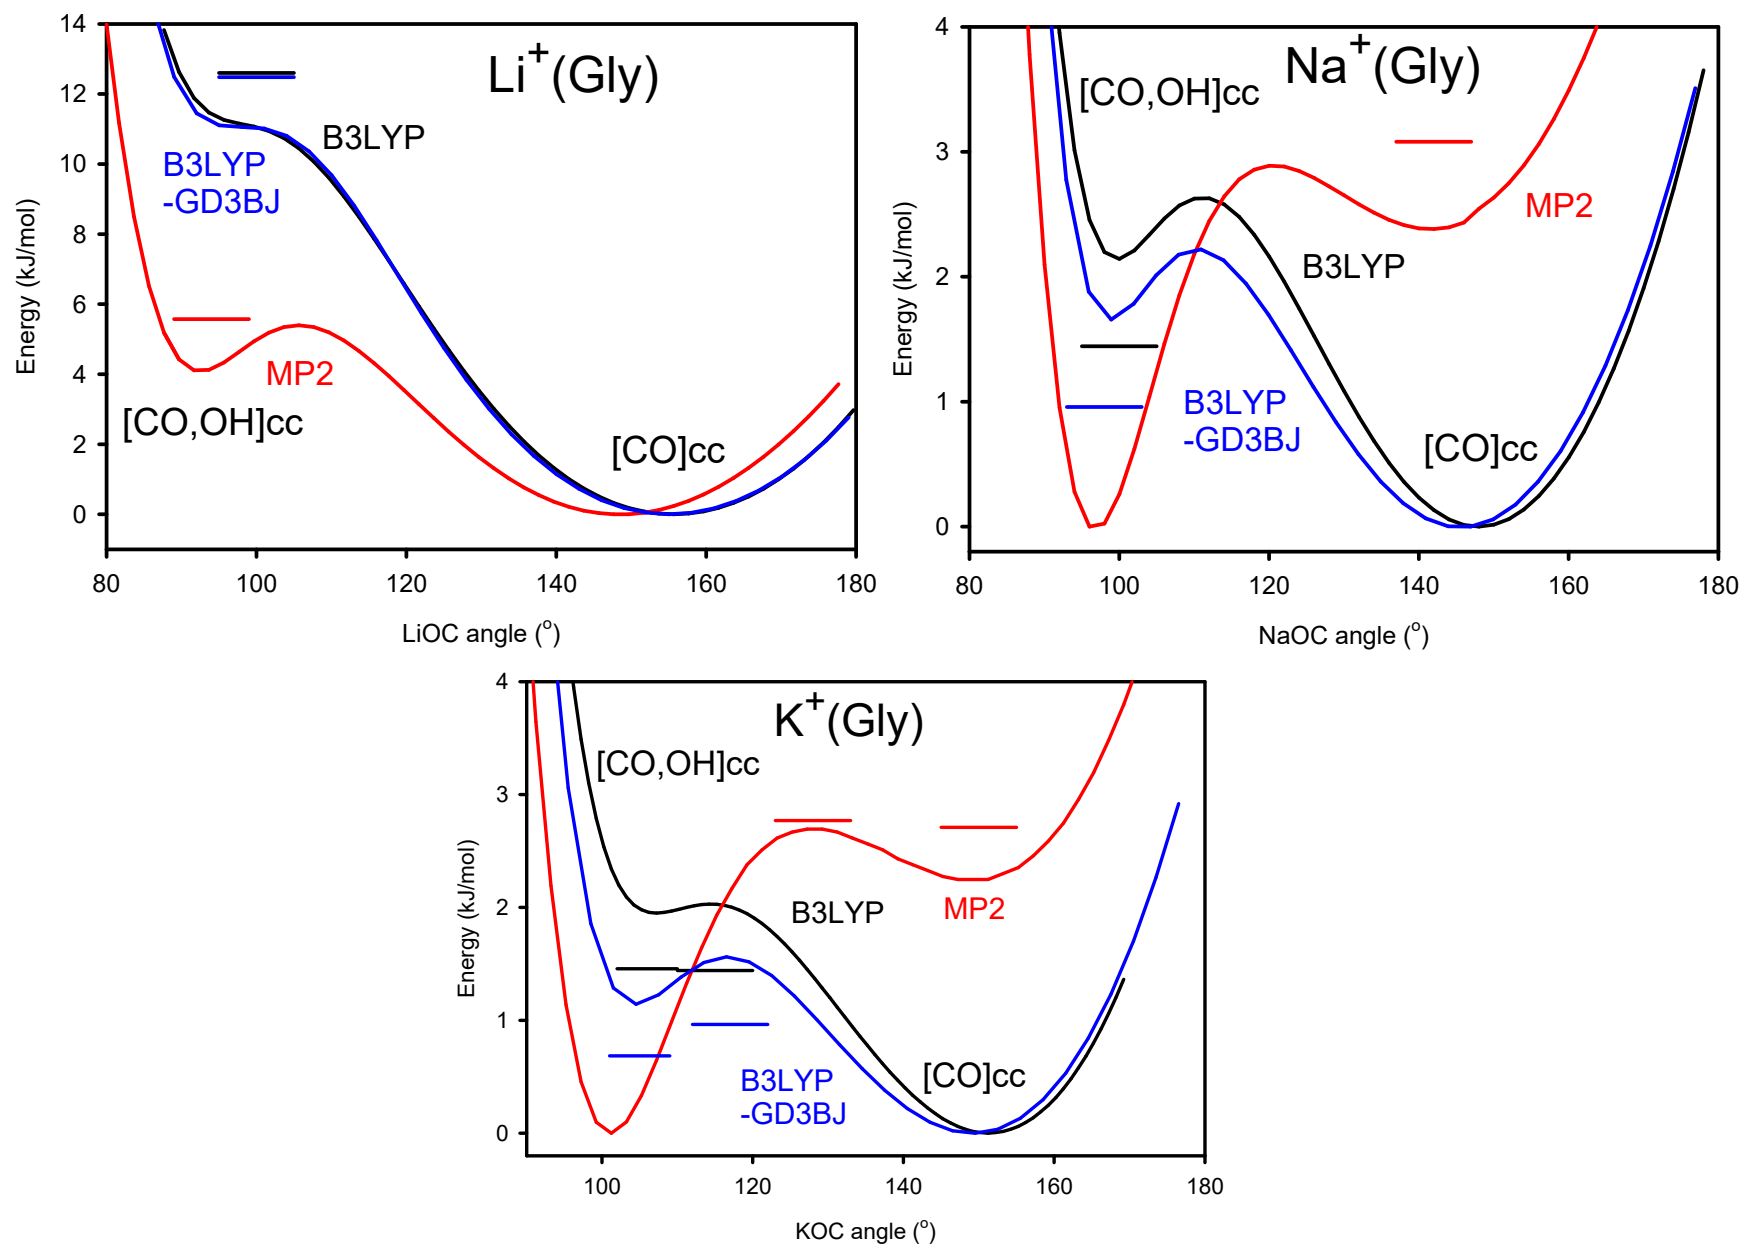

Figure S3

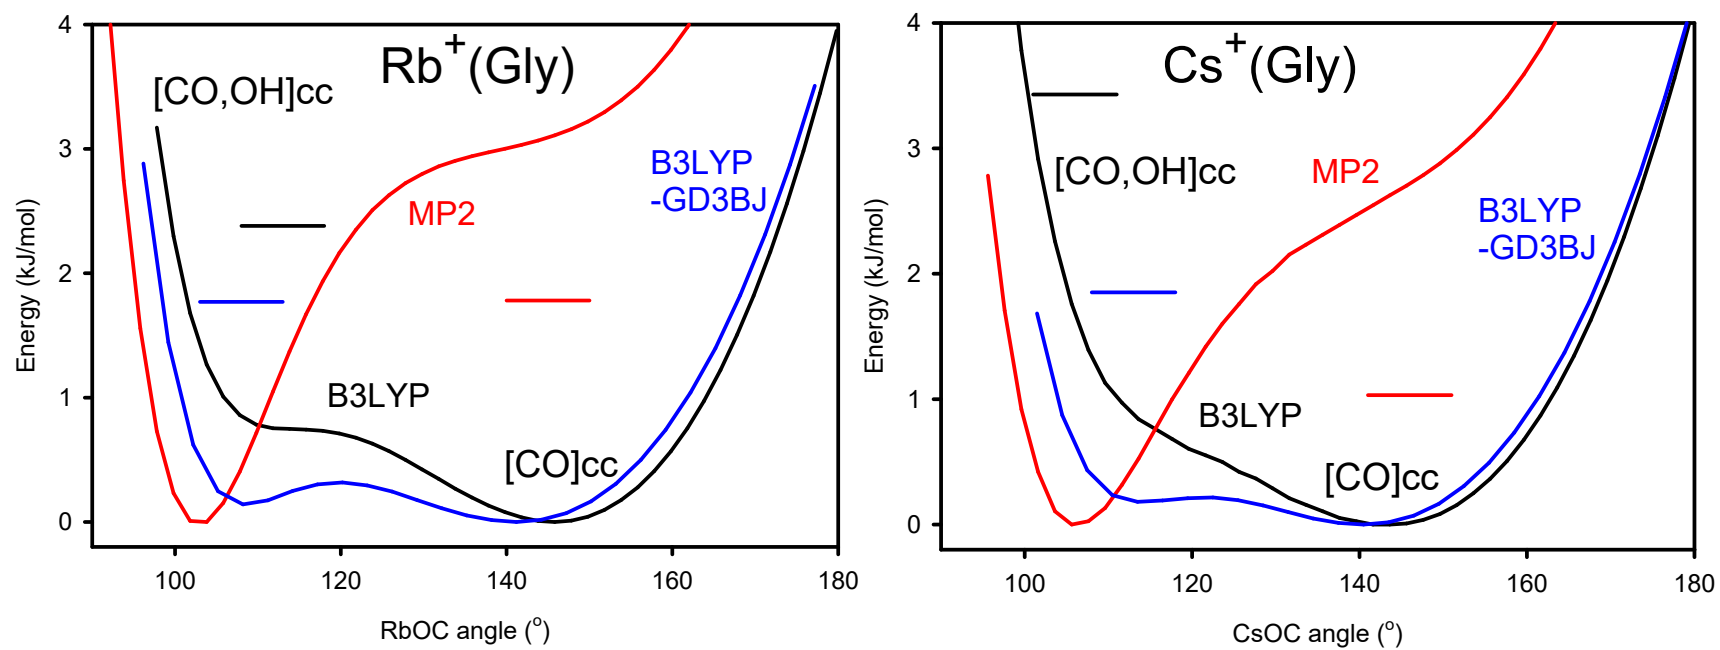

Figure S3

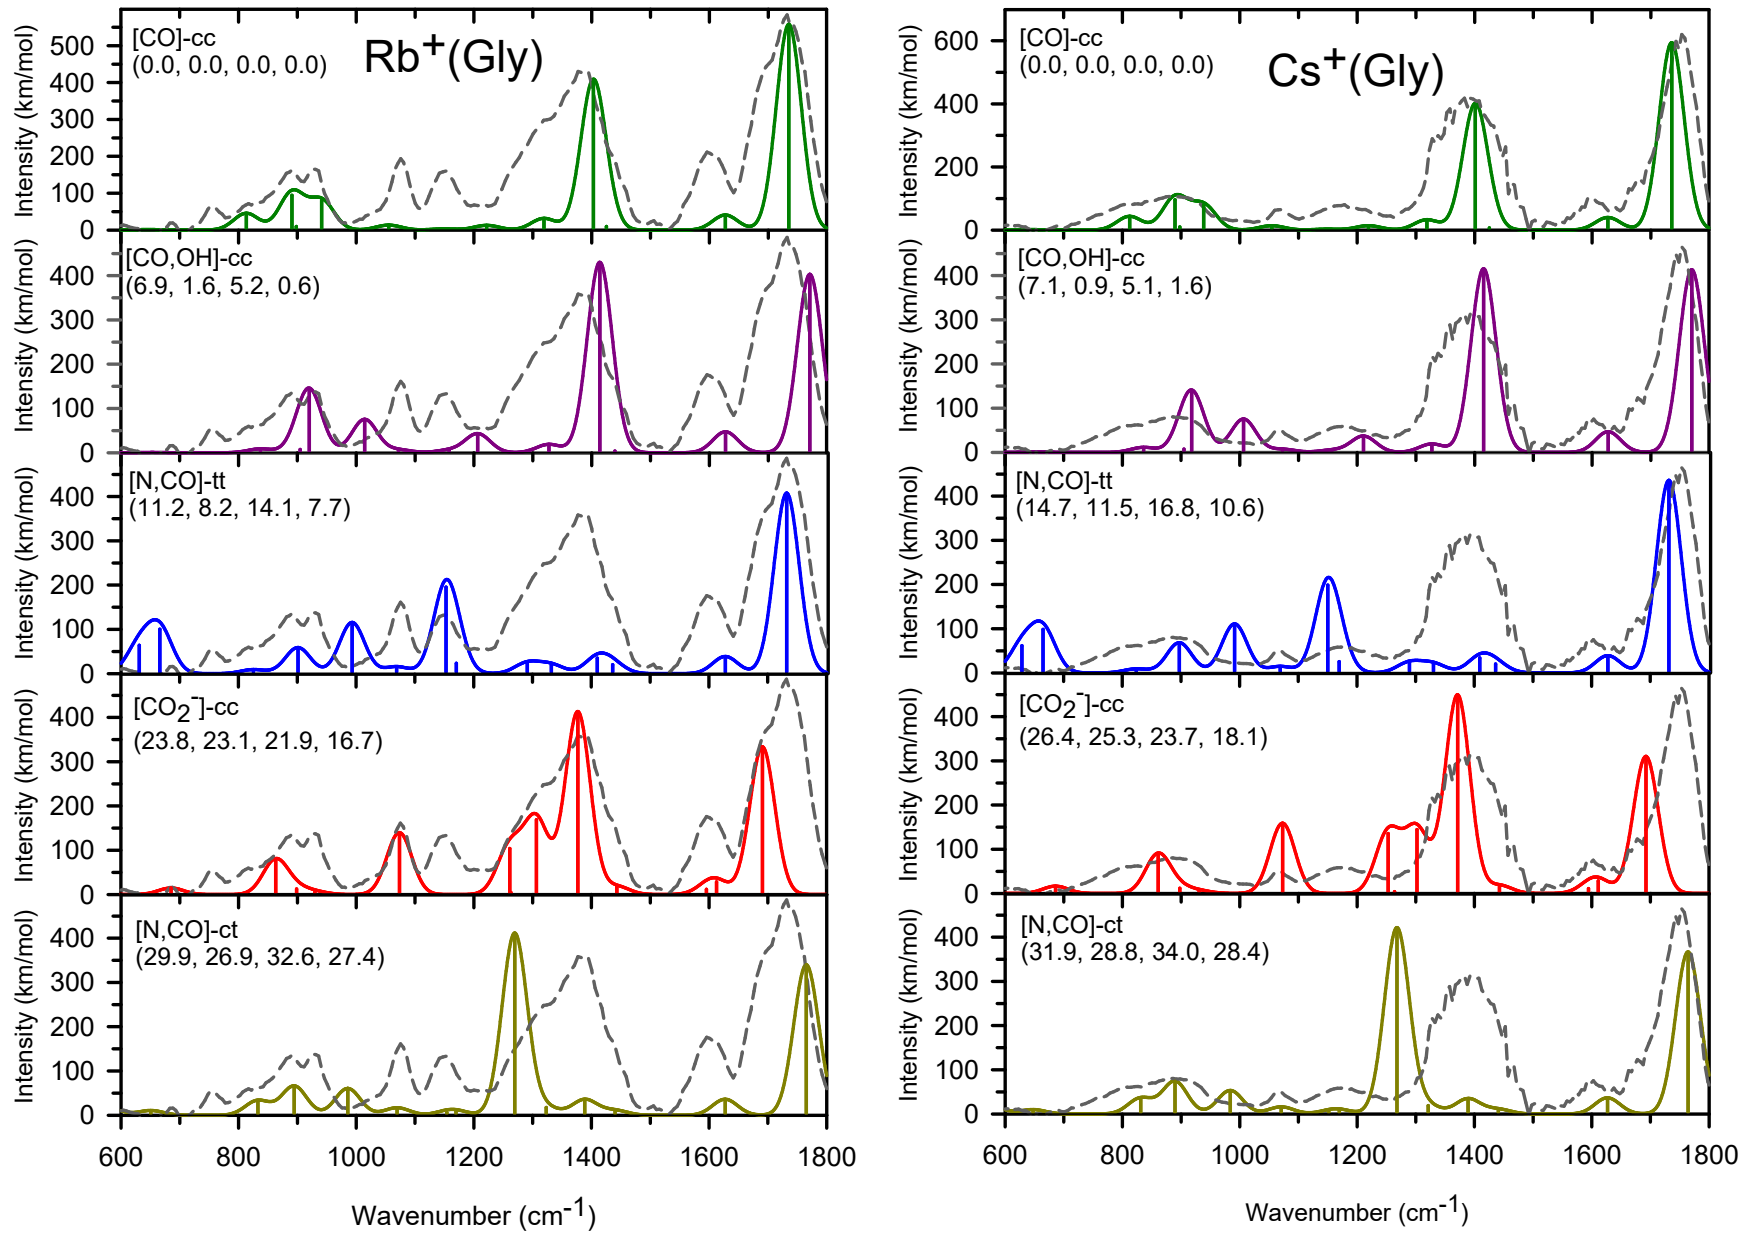

Figure S4
